# Supplementary material for: Chemical syntheses of the salvinorin chemotype of KOR agonist
Source: Royal Society of Chemistry journal article supplement (doi:10.1039/d0np00028k), 2020-01-01
Supplement: d0np00028k1.xlsx [file d0np00028k1.xlsx]

## Sheet: Sheet1
Intermediate	Cm Score	Cumulative Yield	Carbon Oxidation	Step Yield	Tanimoto	Cm Score (Bottcher 3
Shenvi1	135.4	100	7	1	0.48	135.4
Shenvi2	329.6	51	9	0.51	0.63	329.6
Shenvi3	279	29.07	9	0.57	0.58	279
Shenvi4	212.7	25.8723	9	0.89	0.57	212.7
Shenvi5	217	23.0263	9	0.89	0.56	217
Shenvi6	256.4	11.5132	11	0.5	0.61	256.4
Shenvi7	271.2	10.477	12	0.91	0.64	271.2
Shenvi8	313.4	5.5528	13	0.53	0.66	313.4
Shenvi9	355.8	3.88696	13	0.7	0.76	355.8
Shenvi10	422.1	3.14844	17	0.81	0.8	422.1
Shenvi11	466	1.98352	19	0.63	0.89	466
Shenvi1	135.4	100	7	1	0.48	135.4
Shenvi2	329.6	51	9	0.51	0.63	329.6
Shenvi3	279	29.07	9	0.57	0.58	279
Shenvi4	212.7	25.8723	9	0.89	0.57	212.7
Shenvi5	217	23.0263	9	0.89	0.56	217
Shenvi6	256.4	11.5132	11	0.5	0.61	2556.4
Shenvi7	271.2	10.477	12	0.91	0.64	271.2
Shenvi8	313.4	5.5528	13	0.53	0.66	313.4
Shenvi9	355.8	3.88696	13	0.7	0.76	355.8
Shenvi10	422.1	3.14844	17	0.81	0.8	422.1
ShenviO6C11	472.1	2.73914	17	0.87	0.76	472.1
ShenviO6C12	472.5	2.38305	19	0.87	0.79	472.5
ShenviO6C13	501.1	2.04943	19	0.86	0.82	501.1
ShenviO6C14 (O6C-20-nor-SalA	436.1	1.0862	20	0.53	0.85	436.1
Metz1	83.7	100	4	1	0.32	83.7
Metz2	128	97	8	0.97	0.4	128
Metz3	150.3	74.69	9	0.77	0.45	150.3
Metz4	154.5	70.9555	12	0.95	0.5	154.5
Metz5	205.1	54.6357	15	0.77	0.54	205.1
Metz6	245.4	42.0695	15	0.77	0.63	245.4
Metz7	323.6	29.028	13	0.69	0.66	343.6	#
Metz8	278.9	25.5446	13	0.88	0.66	278.9
Metz9	284.5	14.8159	14	0.58	0.66	284.5
Metz11	322	3.11133	17	0.21	0.71	322
Metz12	319.4	2.89354	17	0.93	0.71	319.4
Metz13	371.1	1.79399	18	0.62	0.83	371.1
Metz14	453.1	1.7043	19	0.95	0.84	453.1
Metz15	508.5	1.44865	19	0.85	0.79	508.5
Metz16	491.5	1.23135	20	0.85	0.85	491.5
Metz17	436.1	1.21904	20	0.99	0.9	436.1
Metz18 (SalA)	478.5	1	20	0.81	1	478.5
Forsyth18	97.7	100	1	1	0.45	97.7
Forsyth19	65.4	93	2	0.93	0.27	65.4
Forsyth20	92.5	86.49	2	0.93	0.34	92.5
Forsyth21	241.4	43.245	2	0.5	0.41	241.4
Forsyth22	241.8	41.0828	2	0.95	0.39	241.8
Forsyth2	294.2	35.742	5	0.87	0.48	294.2
Forsyth3	227.9	33.2401	5	0.93	0.46	227.9
Forsyth4	232.2	30.5808	5	0.92	0.45	232.2
Forsyth5	265.1	28.1344	8	0.92	0.48	265.1
Forsyth6	340.9	22.5075	9	0.8	0.52	340.9
Forsyth7	381.2	20.2568	9	0.9	0.54	381.2
Forsyth8	365.4	13.572	9	0.67	0.55	365.4
Forsyth9	326.7	12.7577	10	0.94	0.53	326.7
Forsyth10	501.5	9.18555	8	0.72	0.46	499.8	#
Forsyth11	389.8	6.70545	10	0.73	0.57	389.8
Forsyth12	401.1	5.02909	10	0.75	0.57	401.1
Forsyth13	480.8	3.36949	15	0.67	0.67	480.8
Forsyth14	497.5	0.505423	19	0.15	0.76	497.5
Forsyth15	453.1	0.505423	19	1	0.85	453.1
Forsyth16	495.5	0.42961	19	0.85	0.9	495.5
Forsyth17 (SalA)	478.5	0.365168	20	0.85	1	478.5
Hagiwara00	105.33	100	6		0.45	105.3
Hagiwara 0	152.3	60	7	0.6	0.43	152.3
Hagiwara1	171.5	54	7	0.9	0.44	171.5
Hagiwara2	213.7	39.42	7	0.73	0.47	213.7
Hagiwara3	308.7	20.1042	9	0.51	0.52	308.7
Hagiwara4	289.5	20.1042	9	1	0.52	289.5
Hagiwara5	238	15.0782	9	0.75	0.49	238
Hagiwara6	214.9	11.3086	9	0.75	0.49	214.9
Hagiwara7	281.2	11.1955	9	0.99	0.49	281.2
Hagiwara8	359.1	10.5238	9	0.94	0.48	359.1
Hagiwara9	406.4	9.47142	11	0.9	0.49	406.4
Hagiwara10	415.1	8.52427	11	0.9	0.51	415.1
Hagiwara11	415.1	7.67185	11	0.9	0.51	415.1
Hagiwara12	453.4	7.59513	11	0.99	0.48	453.4
Hagiwara13	387.1	7.59513	11	1	0.51	387.1
Hagiwara14	391.4	5.9242	11	0.78	0.54	391.4
Hagiwara15	480.3	1.59953	16	0.27	0.57	480.3
Hagiwara16	477.8	1.18366	16	0.74	0.62	477.8
Hagiwara17	400	0.875905	16	0.74	0.64	400
Hagiwara18	380.8	0.64817	19	0.74	0.78	380.8
Hagiwara19	393.3	0.583353	19	0.9	0.89	393.3
Hagiwara20	448.4	0.583353	18	1	0.8	448.4
Hagiwara21	436.1	0.408347	20	0.7	0.9	436.1
Hagiwara22 (SalA)	478.5	0.351178	20	0.86	1	478.5
Hagiwara00	105.33	100	6	1	0.45	105.3
Hagiwara 0	152.3	60	7	0.6	0.43	152.3
Hagiwara1	171.5	54	7	0.9	0.44	171.5
Hagiwara2	213.7	39.42	7	0.73	0.47	213.7
Hagiwara3	308.7	20.1042	9	0.51	0.52	308.7
Hagiwara4	289.5	20.1042	9	1	0.52	289.5
Hagiwara2--1	344.9	18.6969	9	0.93	0.52	344.9
Hagiwara2--2	519.6	12.34	7	0.66	0.46	518	#
Hagiwara2--3	565.1	12.34	7	1	0.46	566.3	#
Hagiwara2--4	553.5	8.63797	11	0.7	0.49	551.8	#
Hagiwara2--5	441.8	6.47848	13	0.75	0.59	441.8
Hagiwara2--6	449.6	6.15455	14	0.95	0.64	449.6
Hagiwara2--7	466.3	3.93891	18	0.64	0.75	466.3
Hagiwara2--9	410.9	1.02412	18	0.26	0.84	410.9
Hagiwara2--10	393.9	1.00364	19	0.98	0.89	393.9
Hagiwara20	448.4	1.00364	17	1	0.8	448.4
Hagiwara21	436.1	0.702545	20	0.7	0.9	436.1
Hagiwara22 (SalA)	478.5	0.604189	20	0.86	1	478.5
Evans1	158.8	100	1		0.33	160.8	#
Evans2	207	92	2	0.92	0.43	209	#
Evans3	167	78.2	2	0.85	0.47	167
Evans4	245.2	55.522	2	0.71	0.48	245.2
Evans5	151	51.0802	4	0.92	0.46	151
Evans6	108.7	50.5694	4	0.99	0.4	108.7
Evans7	133	39.4442	4	0.78	0.38	113
Evans8	322.6	24.0609	5	0.61	0.49	324.5	#
Evans9	388.9	23.8203	5	0.99	0.52	390.9	#
Evans10	261.6	22.3911	5	0.94	0.53	261.6
Evans11	272.9	22.1672	5	0.99	0.54	272.9
Evans12	353.5	18.3988	6	0.83	0.52	353.5
Evans13	426.9	15.455	6	0.84	0.49	426.9
Evans15	425.3	15.3004	6	0.99	0.49	425.3
Evans14a	507.3	12.8524	6	0.84	0.5	507.3
Evans16	394.5	11.8242	6	0.92	0.54	394.5
Evans21	614.1	8.86812	15	0.75	0.56	614.1
Evans22	680.4	8.60208	15	0.97	0.53	680.4
Evans23	625.1	7.13973	15	0.83	0.54	625.1
Evans24	611.9	6.63995	15	0.93	0.55	611.9
Evans25	615.9	6.37435	15	0.96	0.56	615.9
Evans26	483.3	5.92814	15	0.93	0.6	483.3
Evans27	449.2	5.63174	16	0.95	0.62	449.2
Evans28	506.4	5.35015	17	0.95	0.68	506.4
Evans29	594.6	4.81513	17	0.9	0.64	593.8	#
Evans30	484.4	4.18917	17	0.87	0.69	484.4
Evans31	492.7	3.43512	19	0.82	0.73	492.7
Evans32	408.1	2.98855	19	0.87	0.76	408.1
Evans33	436.1	2.83912	20	0.95	0.86	436.1
Evans34	436.1	0.766564	20	0.27	0.93	436.1
Evans35 (SalA)	478.5	0.59792	20	0.78	1	478.5
Evans17a	83		4	1	0.32	83.7	#
Evans17b	129.3		6	0.84	0.4	128.4	#
Evans17	111.4		5	0.84	0.37	111.4
Evans18	128.4		6	0.85	0.43	128.4
Evans19	128		7	0.77	0.41	128
Evans20	205.7		7	0.68	0.53	205.7
Evans21	614.1		15	0.75	0.56	614.1
Prisinzano 4	86.5	100	1	1	0.23	86.5
Prisinzano 5	164.4	80	1	0.8	0.33	164.4
Prisinzano 6	165.4	73.6	2	0.92	0.42	165.4
Prisinzano 7	204.9	67.712	2	0.92	0.45	204.9
Prisinzano 8	216.2	60.9408	2	0.9	0.44	216.2
Prisinzano 9a	248.9	48.1432	5	0.79	0.49	248.9
Prisinzano 10	358.8	38.0332	7	0.79	0.54	358.8
Prisinzano 11	371.9	23.9609	7	0.63	0.53	371.9
Prisinzano 11a	476.8	21.0856	14	0.88	0.58	475.9	#
Prisinzano 12	492.9	18.5553	13	0.88	0.57	492.9
Prisinzano 13	559.3	13.3598	13	0.72	0.55	559.3
Prisinzano 14	481.3	11.7566	13	0.88	0.59	481.4	#
Prisinzano 15	485.8	10.3458	13	0.88	0.6	485.8
Prisinzano 15a	500.5	8.17322	14	0.79	0.6	499.7	#
Prisinzano 16	433.3	6.45684	14	0.79	0.63	433.3
Prisinzano 17	399.3	6.134	15	0.95	0.65	399.3
Prisinzano 18 (Target)	445.1	3.25102	18	0.53	0.71	445.1
Prisinzano 0	83.7		4	1	0.32	83.7
Prisinzano 1	128		7	0.97	0.42	128
Prisinzano 2	183.3		7	0.97	0.49	183.3
Prisinzano 3	143.5		7	0.95	0.43	143.5
Prisinzano 12	492.9		13	0.77	0.58	492.9
